# Supplementary material for: Flexible and transparent graphene complementary logic gates
Source: Royal Society of Chemistry journal article supplement (doi:10.1039/c8me00100f), 2019-01-01
Supplement: c8me00100f1.pdf [file c8me00100f1.pdf]

Supporting information for

## Flexible and Transparent Graphene Complementary Logic Gates

Ajjiporn Dathbun,<sup>1</sup> Seongchan Kim,<sup>1</sup> Sungjoo Lee,<sup>1,2</sup> Do Kyung Hwang,<sup>4</sup> Jeong Ho Cho<sup>3,\*</sup>

<sup>1</sup>SKKU Advanced Institute of Nanotechnology (SAINT), <sup>2</sup>Department of Nano Engineering, Sungkyunkwan University, Suwon 440-746, Korea.

<sup>3</sup>Department of Chemical and Biomolecular Engineering, Yonsei University, Seoul 03722, Korea.

<sup>4</sup>Center for Opto-Electronic Materials and Devices, Post-Silicon Semiconductor Institute, Korea Institute of Science and Technology (KIST), Seoul 02792, Korea

\*Corresponding author: J. H. Cho ([jhcho94@yonsei.ac.kr](mailto:jhcho94@yonsei.ac.kr))

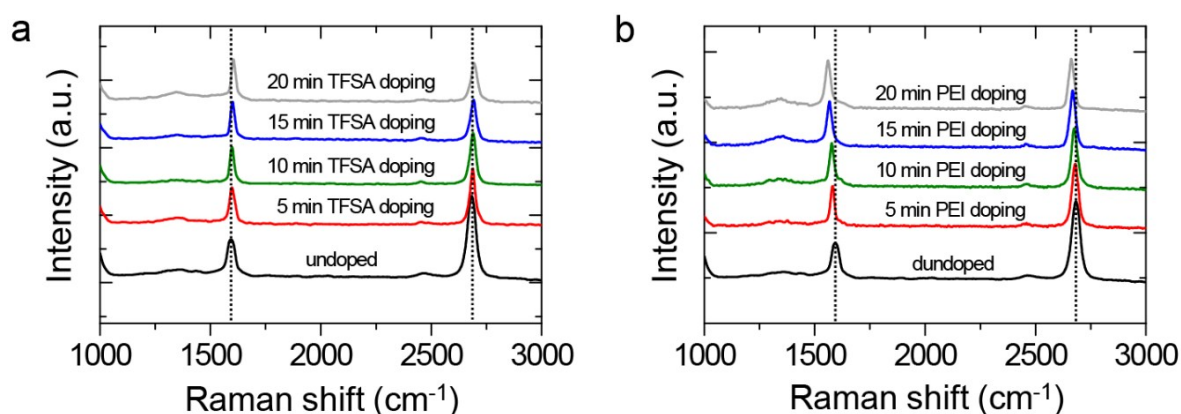

**Figure S1.** Raman spectra of graphene layer doped with (a) TFSA and (b) PEI for various doping times.

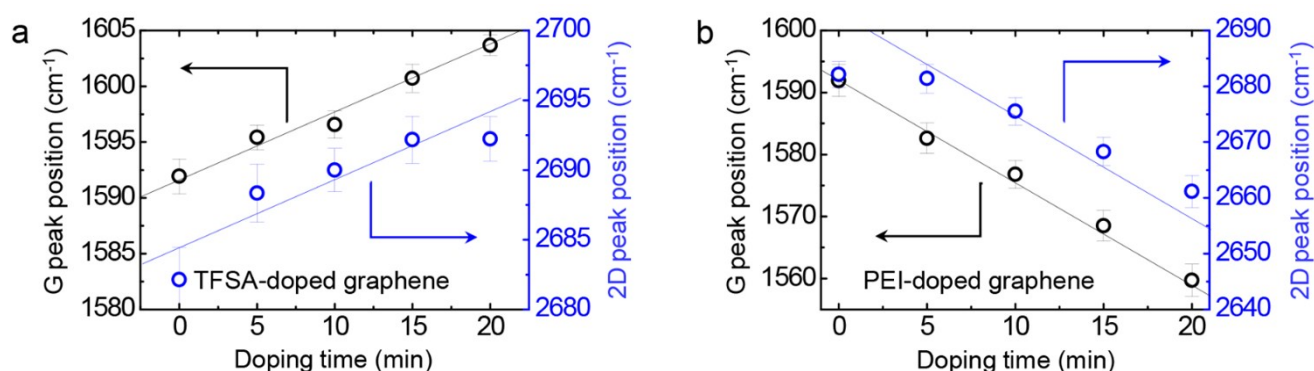

**Figure S2.** Variation of G and 2D band peak positions of graphene layer doped with (a) TFSA and (b) PEI for various doping times.

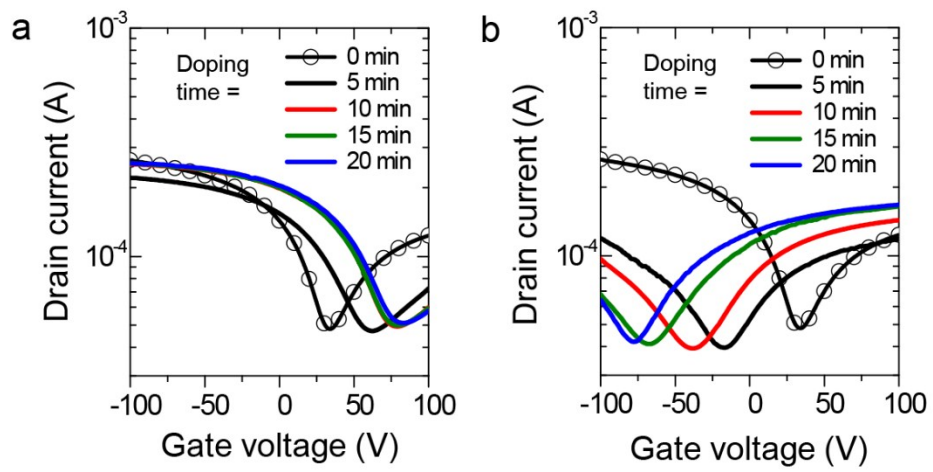

**Figure S3.** Transfer characteristics of the SiO<sub>2</sub>-gated graphene transistor based on the graphene channel doped with (a) TFSA and (b) PEI for various doping times.
